# Supplementary material for: AAV-ie enables safe and efficient gene transfer to inner ear cells
Source: PubMed Central journal article supplement (PMC6700137; doi:10.1038/s41467-019-11687-8), 2019-08-19
Supplement: 41467_2019_11687_MOESM2_ESM.pdf [file 41467_2019_11687_MOESM2_ESM.pdf]

**AAV-ie enables safe and efficient gene transfer  
to inner ear cells**

Fangzhi Tan<sup>1,14\*</sup>, Cenfeng Chu<sup>1,2,3,14</sup>, Jieyu Qi<sup>4,5,14</sup>, Wenyan Li<sup>6,14</sup>, Dan You<sup>6</sup>, Ke Li<sup>3,7,8</sup>, Xin Chen<sup>2,3</sup>, Weidong Zhao<sup>6</sup>, Cheng Cheng<sup>9,10</sup>, Xiaoyi Liu<sup>1,2,3</sup>, Yunbo Qiao<sup>11</sup>, Bing Su<sup>1,2,3</sup>, Shuijin He<sup>2</sup>, Chao Zhong<sup>7</sup>, Huawei Li<sup>6\*</sup>, Renjie Chai<sup>4,5,6,12,13,\*</sup>, Guisheng Zhong<sup>1,2,5\*</sup>

Corresponding author e-mails: Fangzhi Tan

(tanfzh@shanghaitech.edu.cn), Huawei Li (lihuawei63@gmail.com),

Renjie Chai (renjiec@seu.edu.cn) or Guisheng Zhong

(zhongsh@shanghaitech.edu.cn)

**Supplementary Information**

(Contains Supplementary Figures 1-8 with Legends)

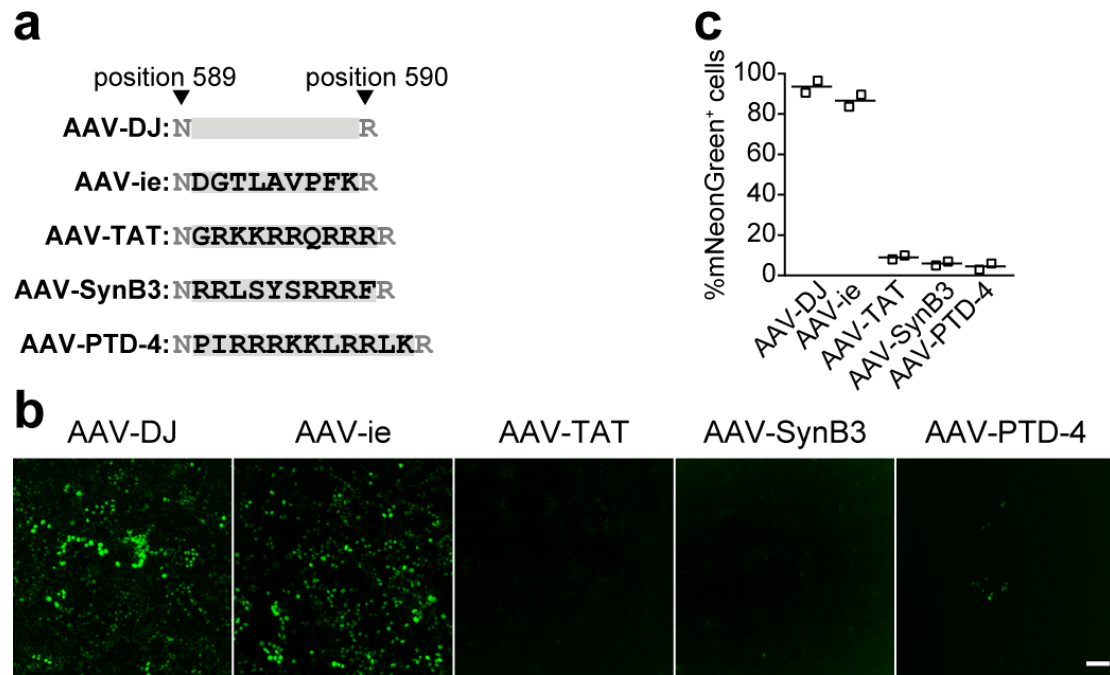

**Supplementary Figure 1 Analysis of the *in vitro* transduction efficient of AAV-DJ and its variant vectors.** (a) Several CPPs and peptide (DGTLAVPFK) were inserted into AAV-DJ's VP1 capsid at the position between N589 and R590. (b) HEK 293T cells were infected with AAV vectors at a MOI of 1000, and 48 h later, NLS-mNeonGreen expression was observed by fluorescent microscope and NLS-mNeonGreen positive efficiencies (c) of these AAV vectors were shown. Data are shown as Mean±SEM. Scale bar, 50  $\mu$ m. Source data are provided as a Source Data file.

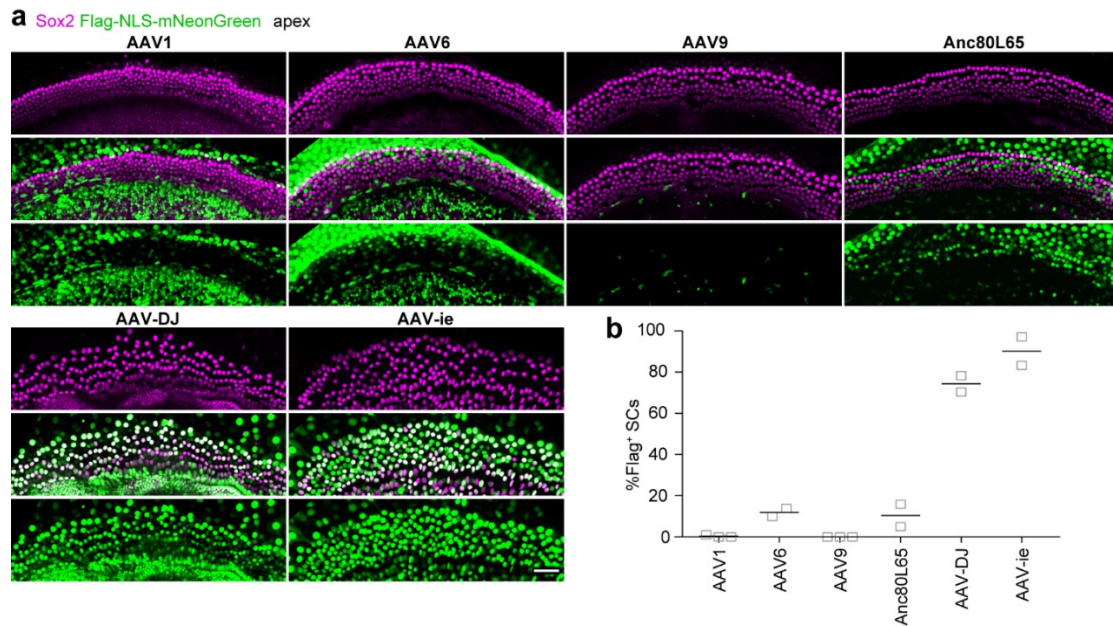

**Supplementary Figure 2 Transduction of organotypic explants of murine cochlea with AAV serotypes.** (a) Representative confocal images of an *in vitro* comparison of several AAV serotypes for NLS-mNeonGreen transgene expression in cochlear explants of C57BL/6 mice. Images show the expression at the cochlear apex for all serotypes after incubation with  $2 \times 10^{10}$  GC particles for 60 h. Green: Flag-NLS-mNeonGreen, magenta: Sox2. Scale bar, 50  $\mu$ m. (b) Percentage of Flag-NLS-mNeonGreen positive SCs per 100  $\mu$ m after 60 h incubation. The horizontal bars represent mean value. N=2-3 mice. Source data are provided as a Source Data file.

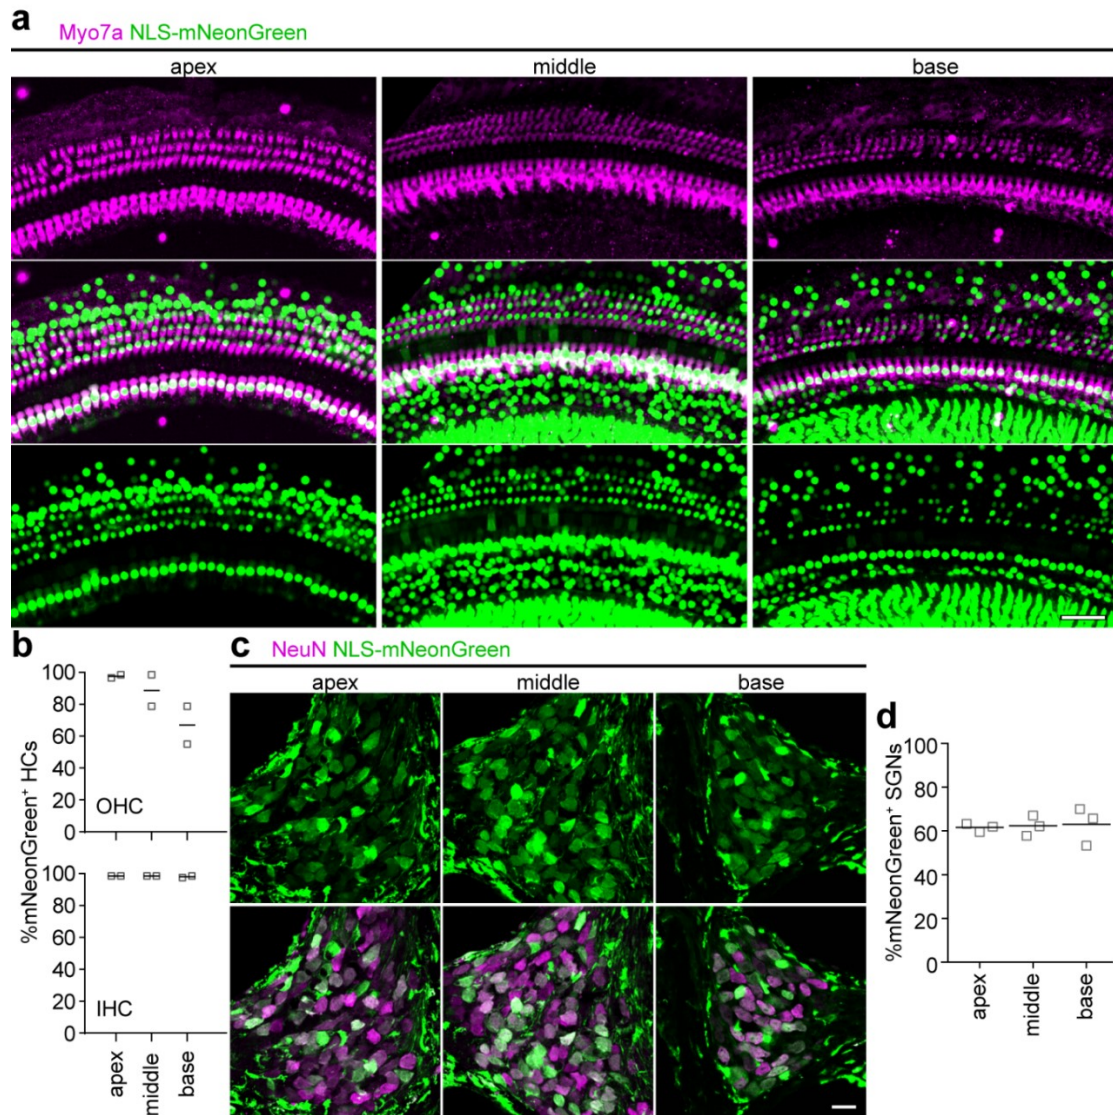

**Supplementary Figure 3 *In vivo* transduction of AAV-ie in hair cells and spiral ganglion neurons.** (a) Representative confocal images of apical, middle and basal regions injected with AAV-ie-NLS-mNeonGreen at the dose of  $6.9 \times 10^9$  GC particles per ear. Green: NLS-mNeonGreen, magenta: Myo7a. Scale bar, 50  $\mu$ m. (b) Quantification of inner and outer hair cell infection efficiency. Horizontal bars represent mean value. N=2 mice. Source data are provided as a Source Data file. (c) Representative confocal images of SGNs infected with AAV-ie-NLS-mNeonGreen at the dose of  $6.9 \times 10^9$  GC particles per ear. Temporal bone was harvested at day 27 after microinjection with 1.5  $\mu$ L of AAV stock solution at P3. Green: NLS-mNeonGreen, magenta: NeuN (a marker for spiral ganglion neurons). Scale bar, 20  $\mu$ m. (d) Percentage of NLS-mNeonGreen positive SGNs. Horizontal bars represent mean value. N=3 mice. Source data are provided as a Source Data file.

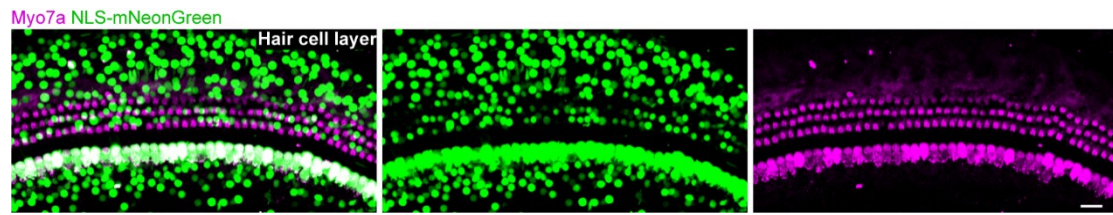

**Supplementary Figure 4** *In vivo* transduction of AAV-ie in adult cochlear hair cells. Representative confocal images of cochlear hair cells. Green: NLS-mNeonGreen, magenta: Myo7a. Scale bar, 20  $\mu\text{m}$ . Mice were injected at P30 with AAV-ie-NLS-mNeonGreen at dose of  $1 \times 10^{10}$  GCs per ear and the tissue was harvested at P45.

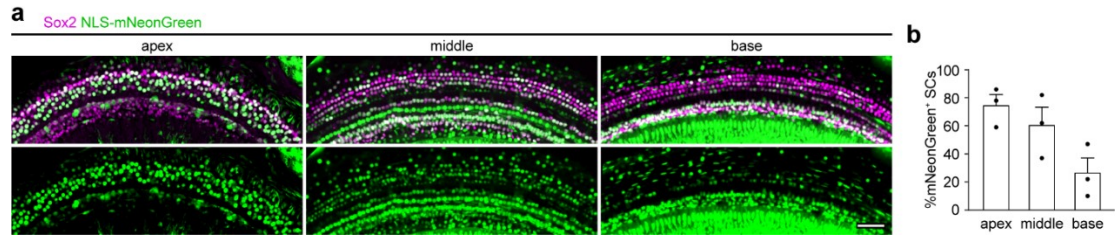

**Supplementary Figure 5** *In vivo* transduction of low-dose AAV-ie in neonatal mice cochleas. (a) Images of the apical, middle and basal regions injected at P3 with AAV-ie-NLS-mNeonGreen at the dose of  $3.6 \times 10^9$  GCs per ear. The cochlea was harvested at P17 and stained with anti-Sox2 antibody (magenta) and imaged for mNeonGreen (green). Scale bar, 50  $\mu\text{m}$ . (b) Percentage of NLS-mNeonGreen positive SCs per 100  $\mu\text{m}$  corresponding to (a). Data are shown as Mean $\pm$ SEM. N=3 mice. Source data are provided as a Source Data file.

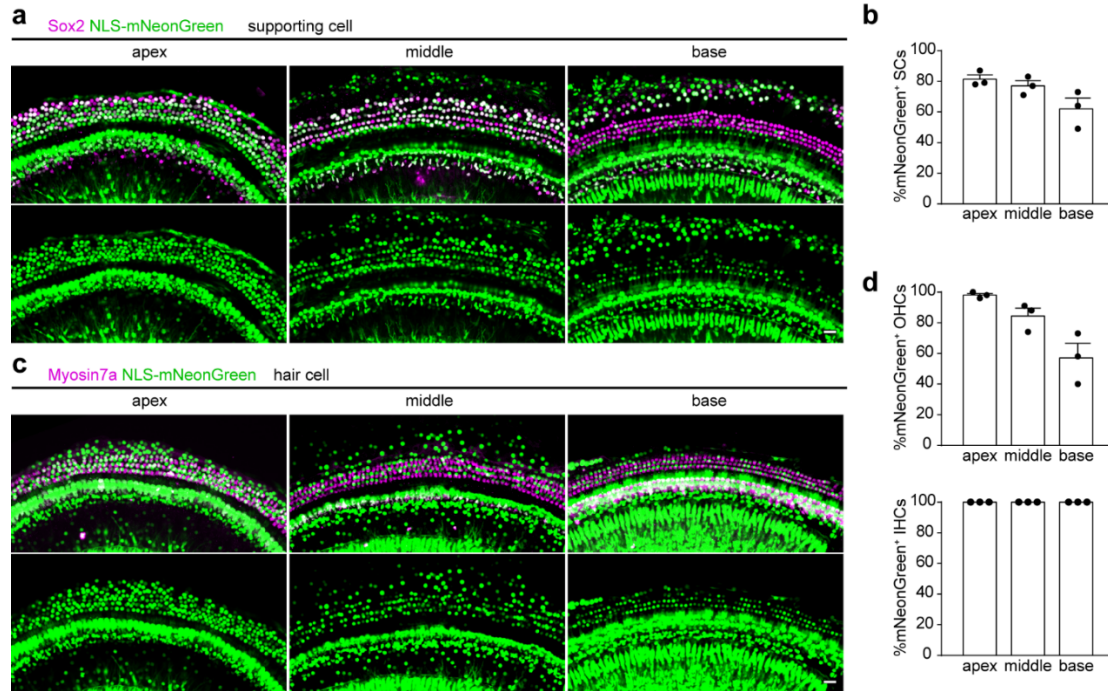

**Supplementary Figure 6 Long-term *in vivo* cochlear transgene expression mediated by AAV-ie.** Mouse cochleae from P3 mice injected with AAV-ie-NLS-mNeonGreen ( $1 \times 10^{10}$  GCs per ear). The tissues were harvested at P30 fixed and stained with anti-Sox2 antibody (**a**, magenta) or anti-Myo7a antibody (**c**, magenta) and imaged for mNeonGreen fluorescence (green). Scale bar, 20  $\mu$ m. **(b)** Percentage of NLS-mNeonGreen positive SCs per 100  $\mu$ m corresponding to (a). Data are shown as Mean $\pm$ SEM. N=3 mice. Source data are provided as a Source Data file. **(d)** Percentage of NLS-mNeonGreen positive HCs per 100  $\mu$ m corresponding to (c). Data are shown as Mean $\pm$ SEM. N=3 mice. Source data are provided as a Source Data file.

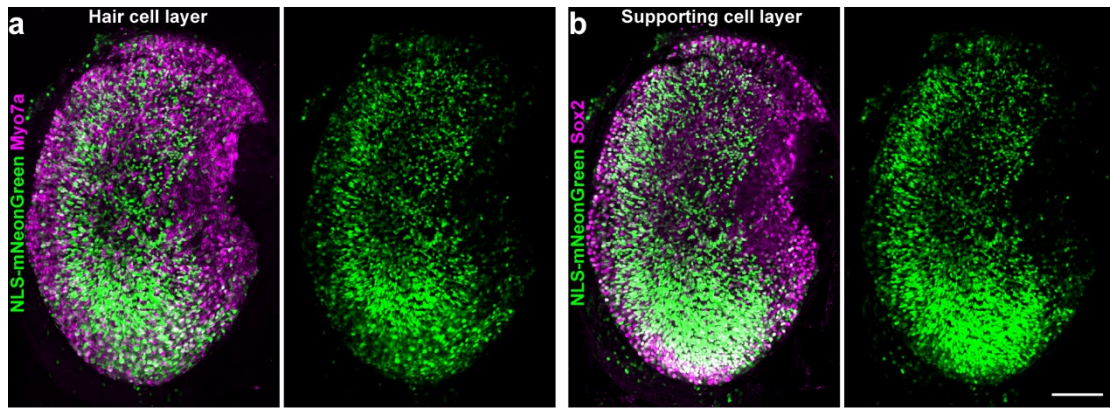

**Supplementary Figure 7** *In vivo* transduction of AAV-ie in adult utricle. Representative confocal images of hair cells (**a**) and supporting cells (**b**) in utricular epithelia. Scale bar, 100  $\mu\text{m}$ . Mice were injected at P30 with AAV-ie-NLS-mNeonGreen at dose of  $1 \times 10^{10}$  GCs per ear and the tissue was harvested at P45.



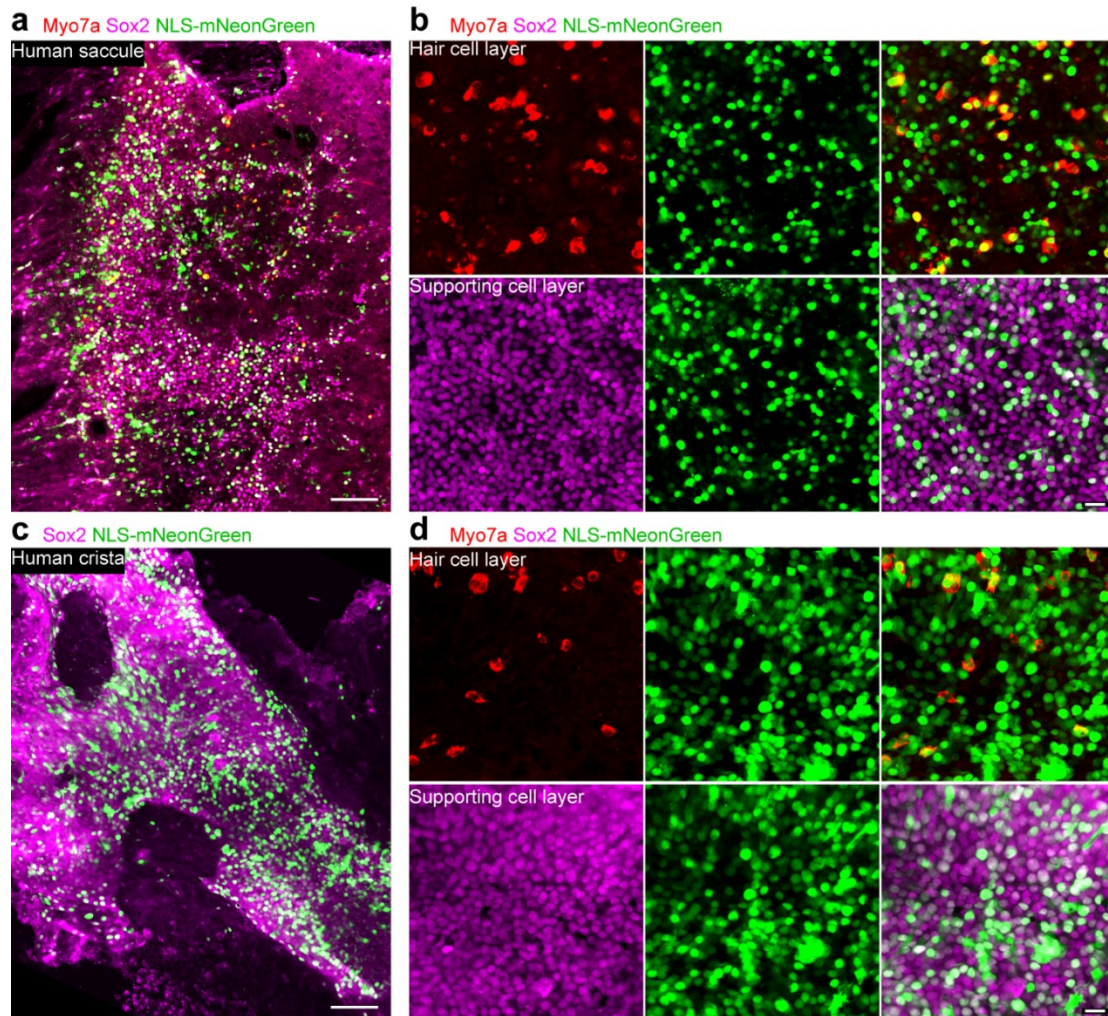

**Supplementary Figure 8** *In vitro* transduction of AAV-ie in human saccule and crista. The human tissues were exposed to  $5 \times 10^{10}$  GCs AAV-ie-NLS-mNeonGreen for 24 h, cultured for 7 d, fixed, stained with anti-Myo7a antibody (red) or anti-Sox2 antibody (magenta) and imaged for mNeonGreen fluorescence (green). **(a)** The sensory epithelium of an adult human saccule. Scale bar, 100  $\mu\text{m}$ . **(b)** Magnified regions from **(a)** in HC layer and SC layer. Scale bar, 20  $\mu\text{m}$ . **(c)** The sensory epithelium of a crista of semicircular canal. Scale bar, 100  $\mu\text{m}$ . **(d)** Magnified regions from **(c)** in HC layer and SC layer. Scale bar, 20  $\mu\text{m}$ .
